# Supplementary material for: Ferromagnetic interactions in Ru(iii)–nitronyl nitroxide radical complex: a potential 2p4d building block for molecular magnets
Source: Royal Society of Chemistry journal article supplement (doi:10.1039/b701657c), 2007-01-01
Supplement: b701657c.pdf [file b701657c.pdf]

## Ferromagnetic interactions in Ru(III)-Nitronyl Nitroxide radical complex: A potential $2p4d$ building block for molecular magnets

Fabrice Pointillart, Kevin Bernot, Lorenzo Sorace, Roberta Sessoli\* and Dante Gatteschi

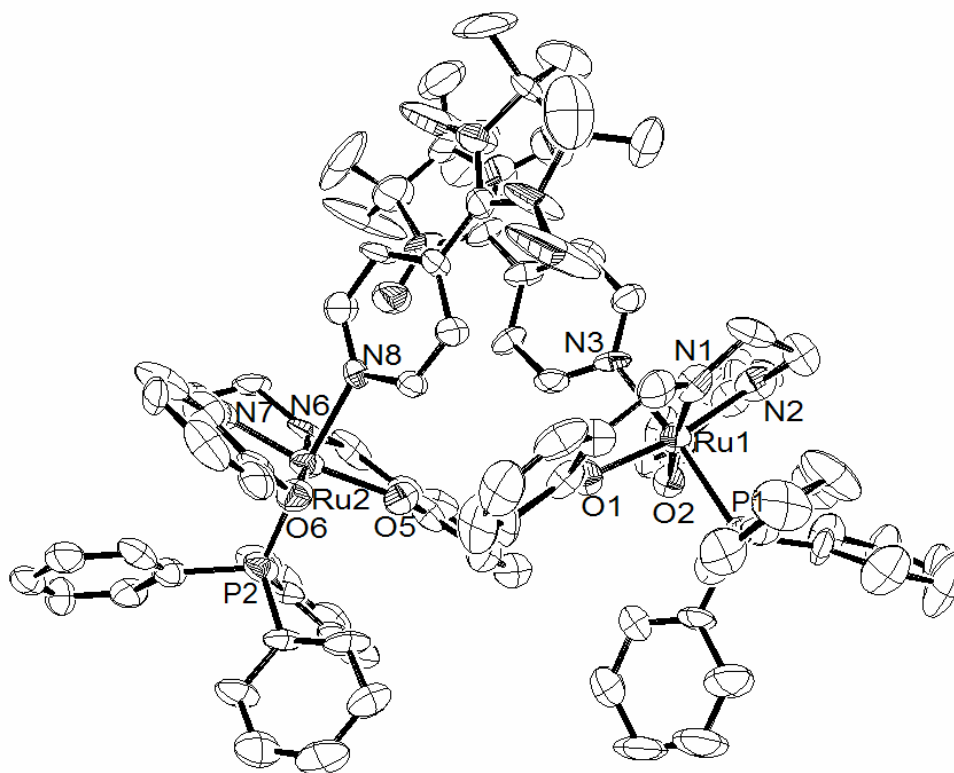

**Fig. S1.** ORTEP view of the asymmetric unit of [Ru(salen)(PPh<sub>3</sub>)(NITpPy)](ClO<sub>4</sub>)(H<sub>2</sub>O)<sub>2</sub> **1** with thermal ellipsoids at 30% probability. Perchlorate counter anions, water molecules and hydrogen atoms are omitted for clarity.

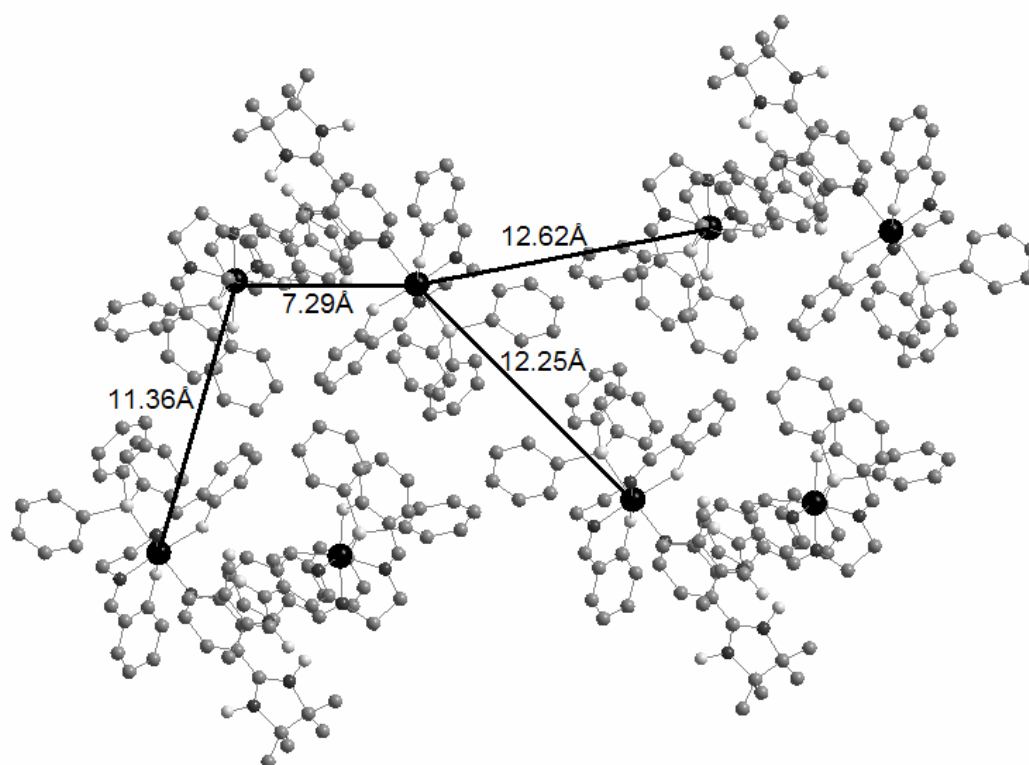

**Fig. S2.** Packing view of **1** showing the intermolecular distances Ru-Ru. Highlight of the dimer character of the packing crystal.
